# Supplementary material
Source: PubMed Central journal article supplement (PMC4900187)
Supplement: NIHMS776548-supplement-5.pdf [file NIHMS776548-supplement-5.pdf]

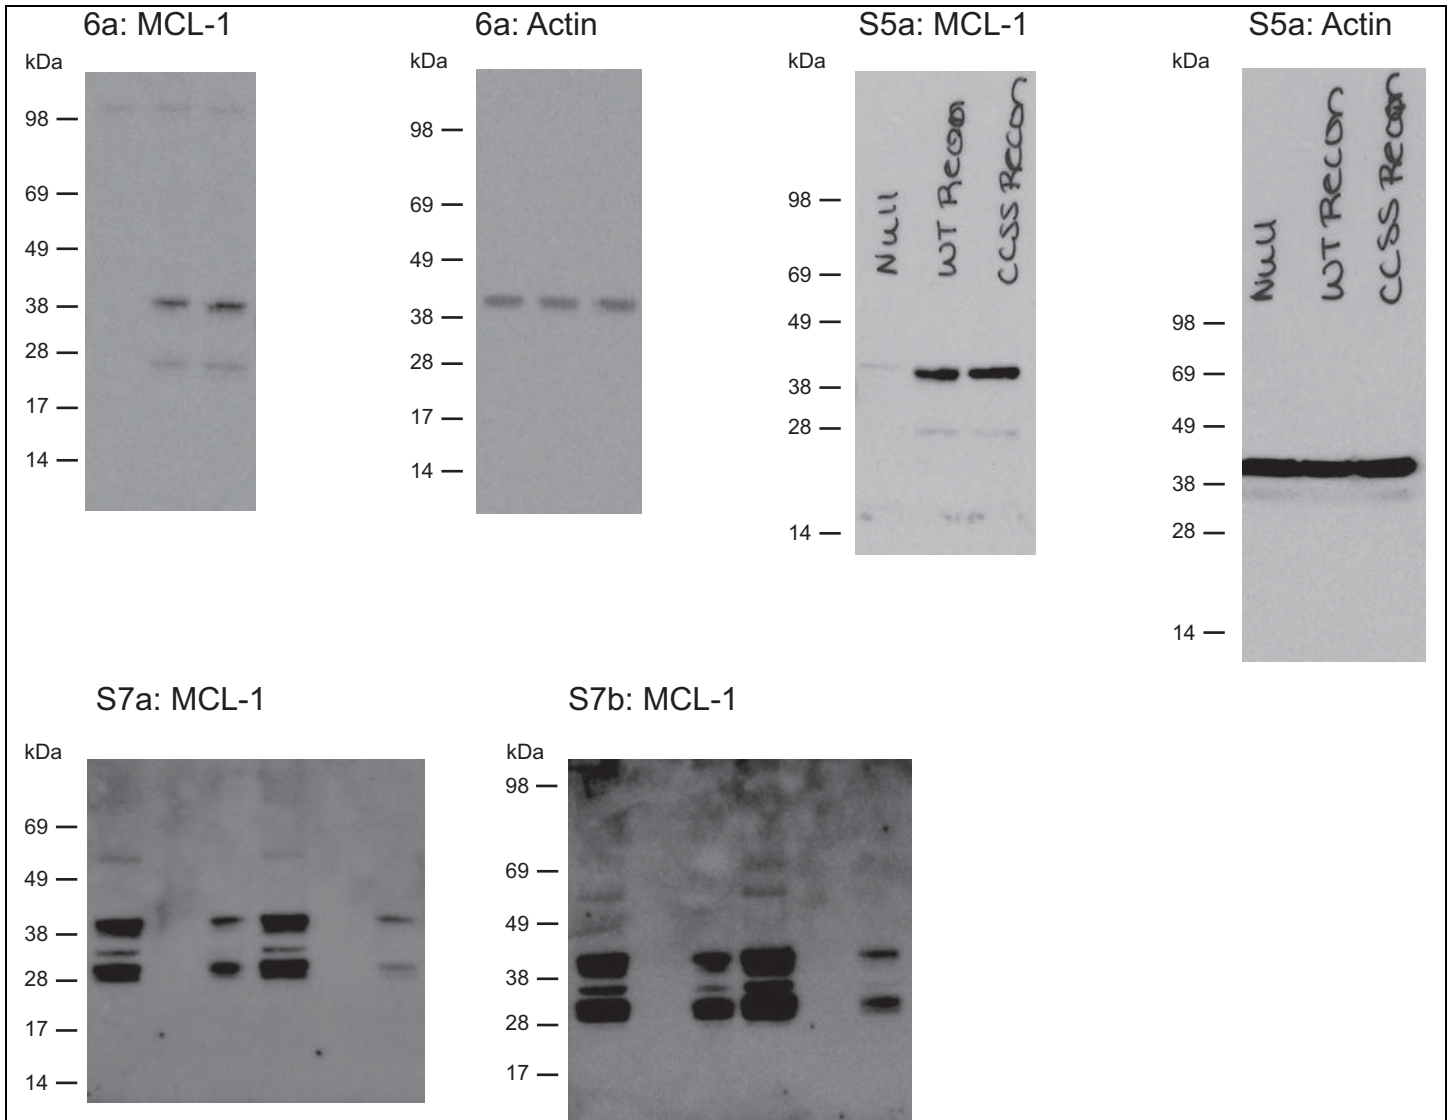

**Supplementary Data Set 1**

**MCL-1 and actin Western blot analyses**

Full Western blots of the immunoreactive MCL-1 and actin bands in electrophoresed MEF lysates (**Fig. 6a, Supplementary Fig. 5a**) and the immunoreactive MCL-1 bands from streptavidin pull-downs of biotinylated MCL-1 SAHB<sub>D</sub> (**Supplementary Fig. 7a-b**).
